# Supplementary material for: Extracellular vesicles in oral squamous carcinoma carry oncogenic miRNA profile and reprogram monocytes via NF-κB pathway
Source: PubMed Central journal article supplement (PMC6205181; doi:10.18632/oncotarget.26208), 2018-10-05
Supplement: oncotarget-09-34838-s001.pdf [file oncotarget-09-34838-s001.pdf]

## Extracellular vesicles in oral squamous carcinoma carry oncogenic miRNA profile and reprogram monocytes via NF-κB pathway

### SUPPLEMENTARY MATERIALS

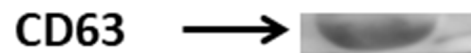

Supplementary Figure 1: Expression of CD63 in Evs derived from CAL27 cells.

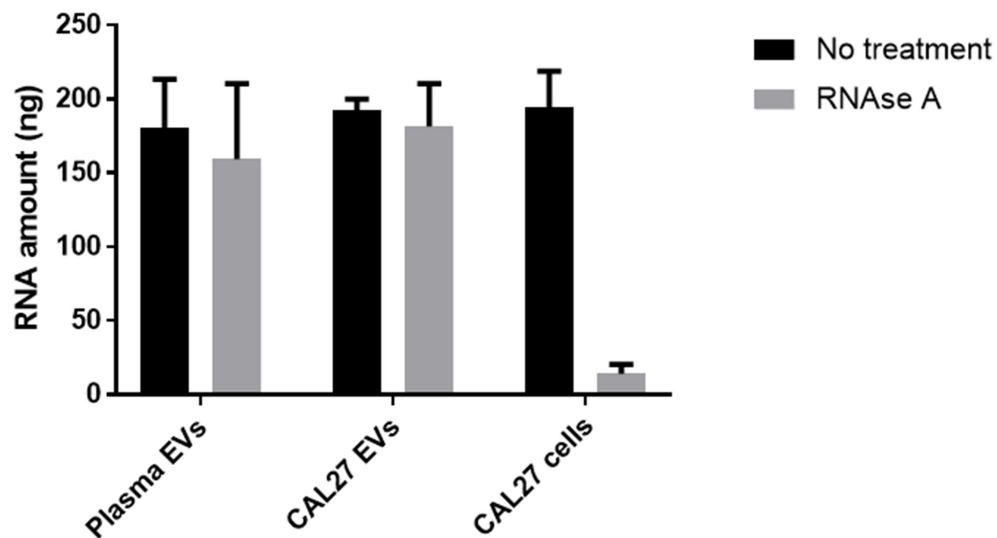

Supplementary Figure 2: Total RNA yield in plasma EVs, CAL27 EVs and CAL27 cells with and without RNase treatment.

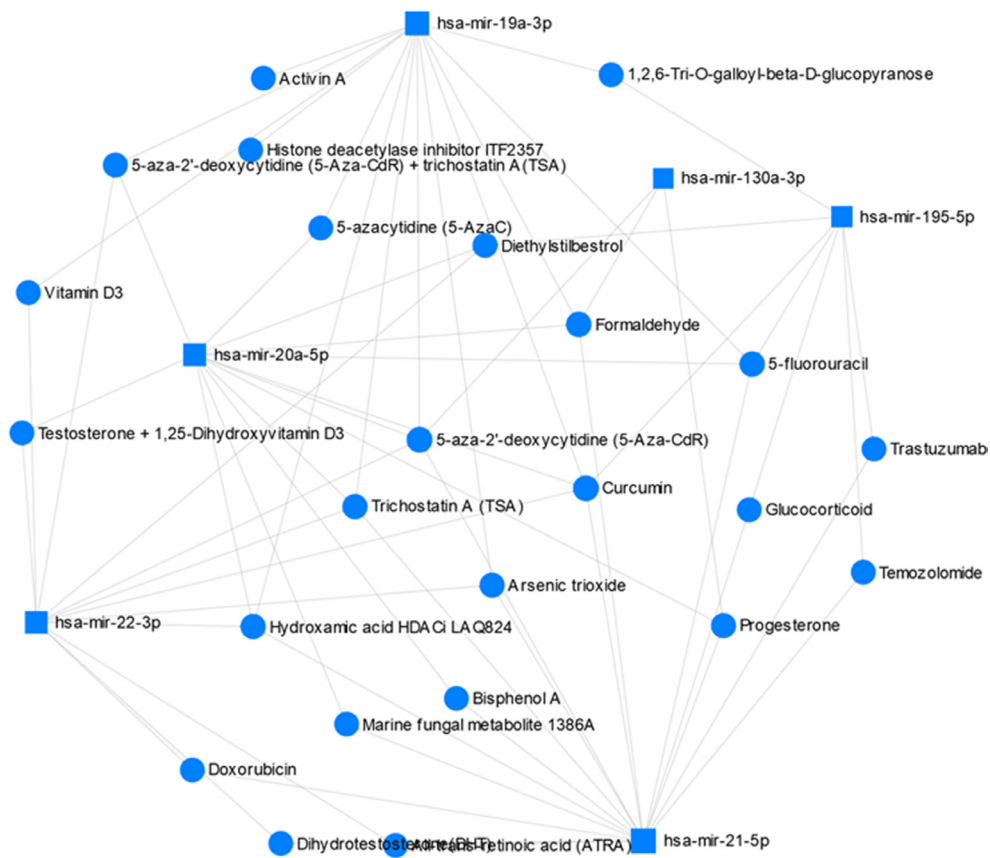

Supplementary Figure 3: Small molecules targeted by EV miRNAs derived from OSCC cancer cells.

**Supplementary Table 1: Demographics and other characteristics in the study samples**

|                                     | <b>Total (<i>n</i> = 34)</b> | <b>OSCC (<i>n</i> = 24)</b> | <b>Controls (<i>n</i> = 10)</b> |
|-------------------------------------|------------------------------|-----------------------------|---------------------------------|
| Gender (male/female)                | 31/49                        | 14/24                       | 6/10                            |
| Age; mean (SD)                      | 63.61 (13.63)                | 65.73 (13.92)               | 62.36 (12.81)                   |
| Race                                |                              |                             |                                 |
| Asian                               | 6                            | 3                           | 3                               |
| Black/African American              | 3                            | 3                           | 0                               |
| White                               | 24                           | 17                          | 7                               |
| Location of malignancies*; <i>n</i> |                              |                             |                                 |
| Alveolar ridge                      | 8                            | 8                           | -                               |
| Tongue                              | 13                           | 13                          | -                               |
| Buccal mucosa                       | 4                            | 4                           | -                               |
| Palate                              | 1                            | 1                           | -                               |
| Tonsil                              | 1                            | 1                           | -                               |

\*Some patients contributed to more than 1 site.

**Supplementary Table 2: KEGG pathway enrichment analysis of miRNA targets.** See Supplementary\_Table\_2

**Supplementary Table 3: Reactome pathway enrichment analysis of miRNA targets.** See Supplementary\_Table\_3
